# Supplementary material for: Demographic and Clinical Characteristics Associated With the Failure of Nonoperative Management of Uncomplicated Appendicitis in Children: Secondary Analysis of a Nonrandomized Clinical Trial
Source: PubMed Central journal article supplement (PMC9062687; doi:10.1001/jamanetworkopen.2022.9712), 2022-05-02
Supplement: jamanetwopen-e229712-s002.pdf [file jamanetwopen-e229712-s002.pdf]

\*Indicates required information. Only first name, last name, and suffix will appear in PubMed.

| <b>*Group Name(s): Midwest Pediatric Surgery Consortium</b> |                   |                              |                  |                                                            |                                          |                                                         |                                                                                            |
|-------------------------------------------------------------|-------------------|------------------------------|------------------|------------------------------------------------------------|------------------------------------------|---------------------------------------------------------|--------------------------------------------------------------------------------------------|
| <b>*First Name and Middle Initial(s)</b>                    | <b>*Last Name</b> | <b>*Suffix (eg, Jr, III)</b> | Academic Degrees | Institution                                                | Location (city, state/province, country) | Role or Contribution, eg, chair, principal investigator | Group (if more than 1 Group listed in the byline) and/or Subgroup (eg, Steering Committee) |
| Gail                                                        | Benser            |                              | MD               | Nationwide Children's Hospital                             | Columbus, OH, USA                        | Member, MWPSC                                           |                                                                                            |
| Jessica                                                     | Kandel            |                              | MD               | University of Chicago Medicine - Comer Children's Hospital | Chicago, IL, US                          | Member, MWPSC                                           |                                                                                            |
| Frederick                                                   | Rescorla          |                              | MD               | Riley Children's Hospital                                  | Indianapolis, IN                         | Member, MWPSC                                           |                                                                                            |
| Daniel                                                      | von Allmen        |                              | MD               | Cincinnati Children's Hospital and Medical Center          | Cincinnati, OH                           | Member, MWPSC                                           |                                                                                            |
| Brad                                                        | Warner            |                              | MD               | St. Louis Children's Hospital                              | St. Louis, MO                            | Member, MWPSC                                           |                                                                                            |
| Cynthia                                                     | Downard           |                              | MD               | University of Louisville School of Medicine                | Louisville, KY                           | Member, MWPSC                                           |                                                                                            |
| Beth                                                        | Rymeski           |                              | MD               | Cincinnati Children's Hospital and Medical Center          | Cincinnati, OH                           | Member, MWPSC                                           |                                                                                            |
| Julia                                                       | Grabowski         |                              | MD               | Ann & Robert Lurie Children's Hospital of Chicago          | Chicago, IL, US                          | Member, MWPSC                                           |                                                                                            |
| Marleta                                                     | Reynolds          |                              | MD               | Ann & Robert Lurie Children's Hospital of Chicago          | Chicago, IL, US                          | Member, MWPSC                                           |                                                                                            |
| Carley                                                      | Lutz              |                              | BS               | Nationwide Children's Hospital                             | Columbus, OH, USA                        | Research Coordinator, MWPSC                             |                                                                                            |
| Sarah                                                       | Fox               |                              | CCRP             | University of Michigan                                     | Ann Arbor, MI                            | Research Coordinator, MWPSC                             |                                                                                            |
