# Supplementary material for: Demographic and Clinical Characteristics Associated With the Failure of Nonoperative Management of Uncomplicated Appendicitis in Children: Secondary Analysis of a Nonrandomized Clinical Trial
Source: PubMed Central journal article supplement (PMC9062687; doi:10.1001/jamanetworkopen.2022.9712), 2022-05-02
Supplement: jamanetwopen-e229712-s003.pdf [file jamanetwopen-e229712-s003.pdf]

## Data Sharing Statement

Minneeci. Demographic and Clinical Characteristics Associated With the Failure of Nonoperative Management of Uncomplicated Appendicitis in Children. *JAMA Netw Open*. Published May 02, 2022. doi:10.1001/jamanetworkopen.2022.9712

### Data

**Data available:** No
